# Supplementary material for: White Leaf and Panicle 2, encoding a PEP-associated protein, is required for chloroplast biogenesis under heat stress in rice
Source: PubMed Central journal article supplement (PMC5853965; doi:10.1093/jxb/erx332), 2017-10-16
Supplement: erx332_suppl_supplementary_figs_s1_s11_tables_s1_s3.pdf [file erx332_suppl_supplementary_figs_s1_s11_tables_s1_s3.pdf]

***White Leaf and Panicle 2* encoding a PEP-associated protein, is required for chloroplast biogenesis under heat stress in rice (*Oryza sativa* L.)**

Yusong Lv<sup>1, 2, †</sup>, Gaoneng Shao<sup>1, †</sup>, Jiehua Qiu<sup>1</sup>, Guiai Jiao<sup>1</sup>, Zhonghua Sheng<sup>1</sup>, Lihong Xie<sup>1</sup>,  
Yawen Wu<sup>1</sup>, Shaoqing Tang<sup>1</sup>, Xiangjin Wei<sup>1, \*</sup>, Peisong Hu<sup>1, \*</sup>

<sup>1</sup>State Key Laboratory of Rice Biology, China National Rice Research Institute, Hangzhou, 310006, China

<sup>2</sup>National Key Laboratory of Crop Genetic Improvement, Huazhong Agricultural University, Wuhan, 430070, China

\* Corresponding. [peisonghu@126.com](mailto:peisonghu@126.com), [hupeisong@caas.cn](mailto:hupeisong@caas.cn) (P. Hu); [weixiangjin@caas.cn](mailto:weixiangjin@caas.cn) (X. Wei)

<sup>†</sup>These authors contributed equally to this work.

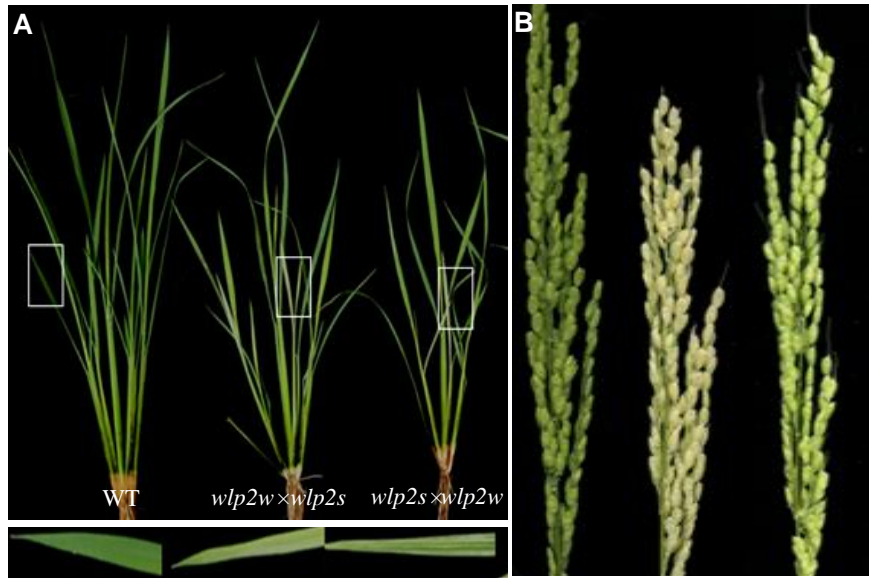

**Fig. S1.** Allelism test for the abnormal phenotypes of the *wlp2s* and *wlp2w* by hybridization. (A) Phenotypes of F<sub>1</sub> hybrid plants crossed by *wlp2s* and *wlp2w* at the tillering stage; white boxes represent basal leaves of the wild-type and F<sub>1</sub> hybrid plants. (B) Young panicles of F<sub>1</sub> hybrid plants. The wild-type and F<sub>1</sub> hybrid plants were grown in paddy fields during the normal growing seasons at the China National Rice Research Institute, in Hangzhou.

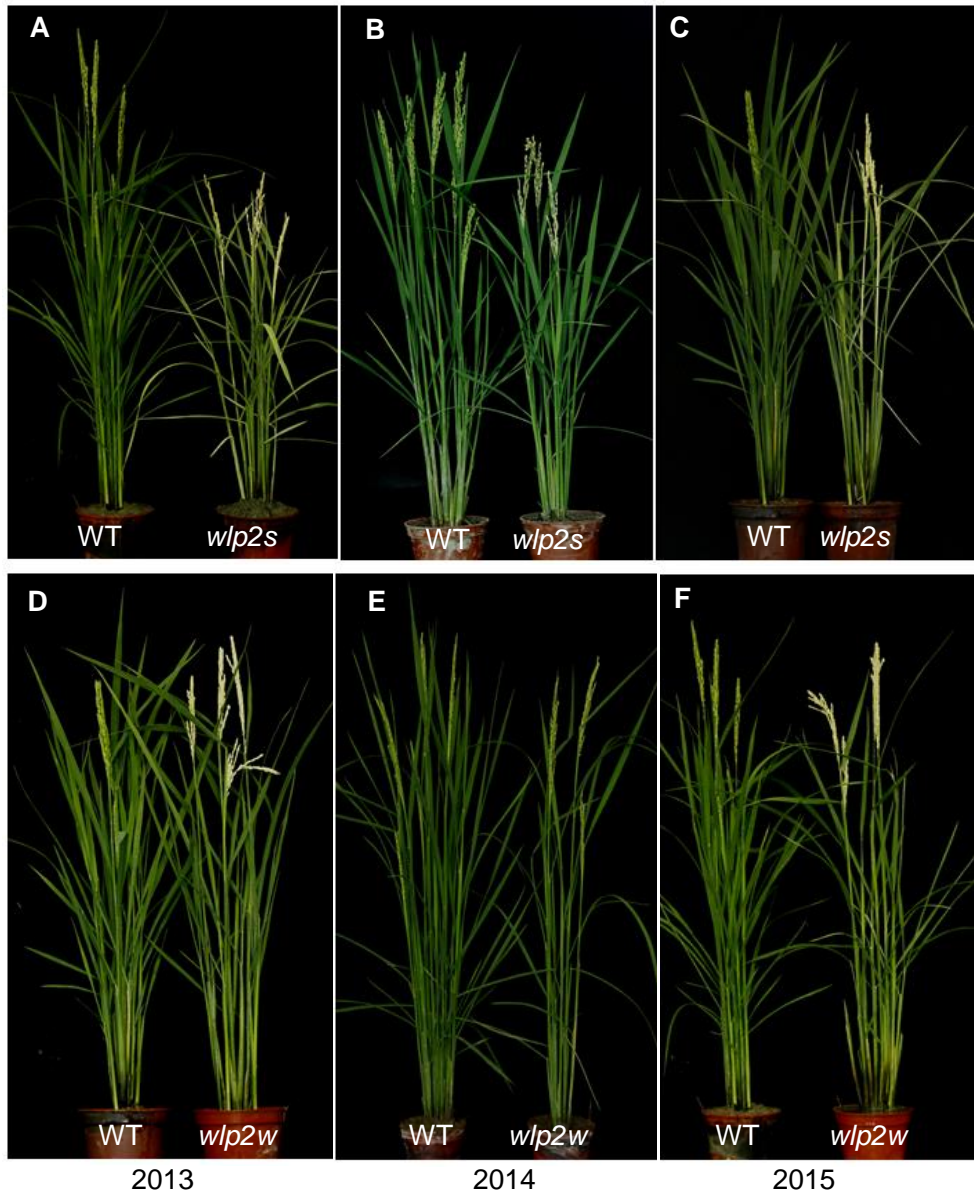

**Fig. S2.** Phenotypes of wild-type and *wlp2* plants at the heading stage during different years. The wild-type and *wlp2* plants were grown in paddy fields during the normal growing seasons in 2013 (A, D), 2014 (B, E) and 2015 (C, F) at the China National Rice Research Institute, in Hangzhou (30 °N latitude). The mean temperature at the heading stage in the summer of 2013, 2014 and 2015 were 34.5 °C, 28.5 °C and 32.8 °C, respectively.

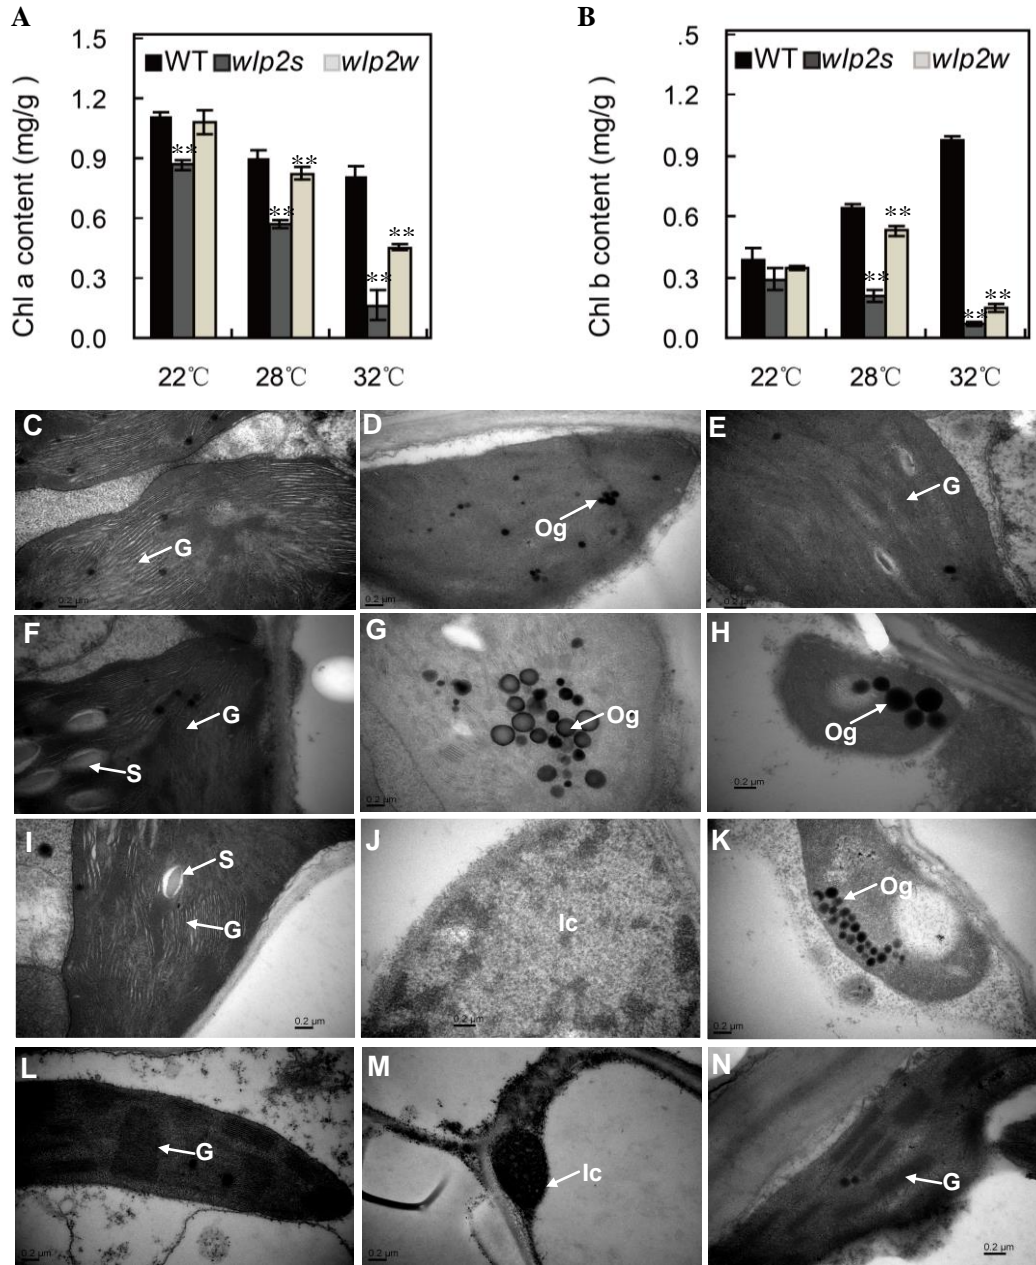

**Fig. S3.** Chlorophyll content and chloroplast ultra-structure of wild-type and *wlp2* mutant plants. (A, B) Chl a, b in leaves of wild-type, *wlp2s* and *wlp2w* at the four-leaf stage. (C-K) The ultrastructures of chloroplasts in lls of the third leaf of wild-type (C, F, I), *wlp2s* (D, G, J) and *wlp2w* (E, H, K) at 22 °C (C-E), 28 °C (F-H), 32 °C (I-K). (L-N) The ultrastructures of chloroplasts in ells of young panicle of wild-type (L), *wlp2s* (M) and *wlp2w* (N) under field condition in Hangzhou (2013). C, chloroplast; G, granna stacks; N, nucleus, Og, osmiophilic plastoglobuli. Ic, immature chloroplast; S, starch granule. Data in (A, B) are shown as means  $\pm$  SD from three individual replicates. The asterisks indicate statistical significance between the wild-type and the mutants, as determined by the Student's *t*-test (\*\*  $P < 0.01$ ).

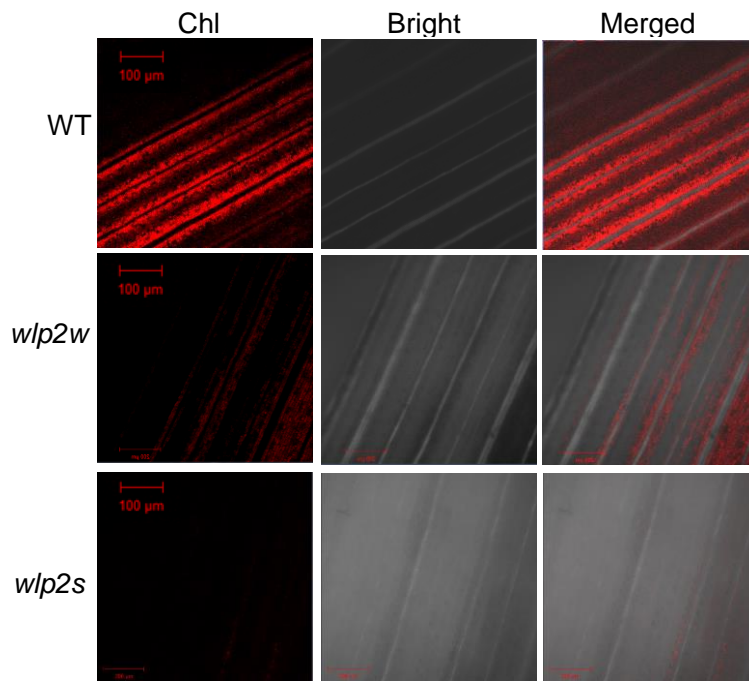

**Fig. S4.** Chlorophyll autofluorescence analysis of the wild type and *wlp2* mutants. Chlorophyll autofluorescence was measured as an indicator of PSII integrity in leaves of wild-type, *wlp2s* and *wlp2w* plants.

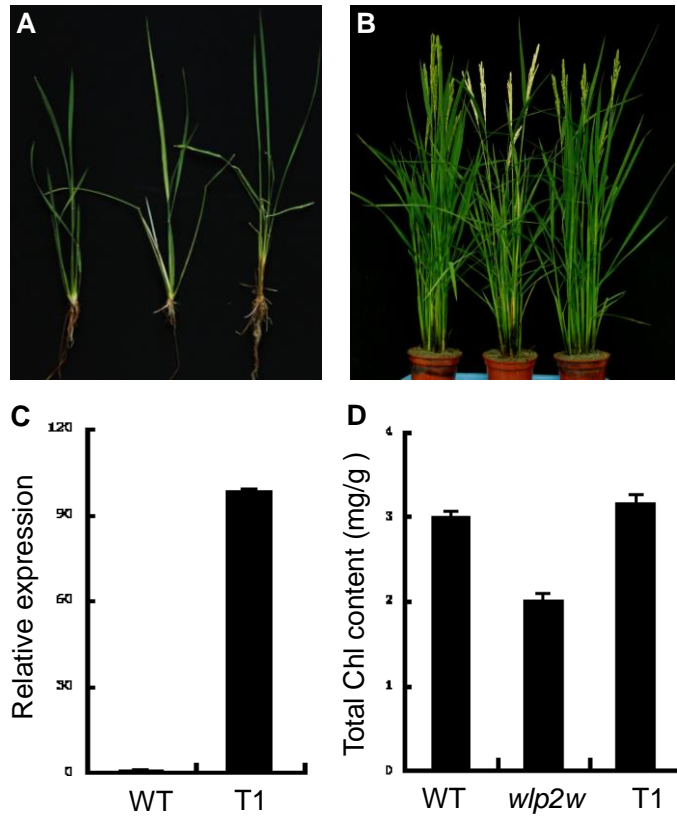

**Fig. S5.** Phenotypes of wild-type, *wlp2w* and transgenic positive T<sub>1</sub> plants. (A, B) Phenotype of wild-type, *wlp2w* and transgenic positive T<sub>1</sub> plants (from left to right) at the tillering stage (A) and heading (B) stages. (C) Expression levels of *WLP2* in wild-type and transgenic positive T<sub>1</sub> plants. (D) Chlorophyll content in 3-weeks seedlings. Data in (C, D) are shown as means  $\pm$ SD from three individual replicates.

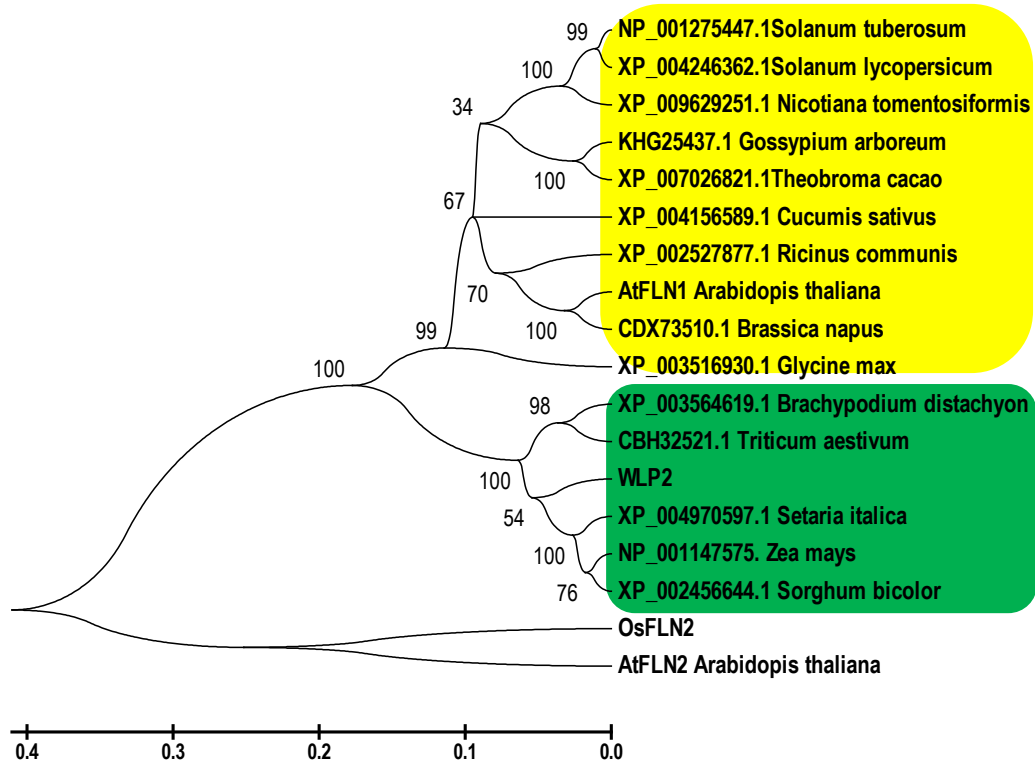

**Fig. S6.** Phylogenetic tree of WLP2 proteins. The phylogenetic tree was constructed using by MEGA 4.0 program and the neighbor joining algorithm. Bootstrap values are shown at each node. Bar indicator of genetic distance is based on branch length. The yellow box stands for dicotyledons and the green box represents monocotyledons.



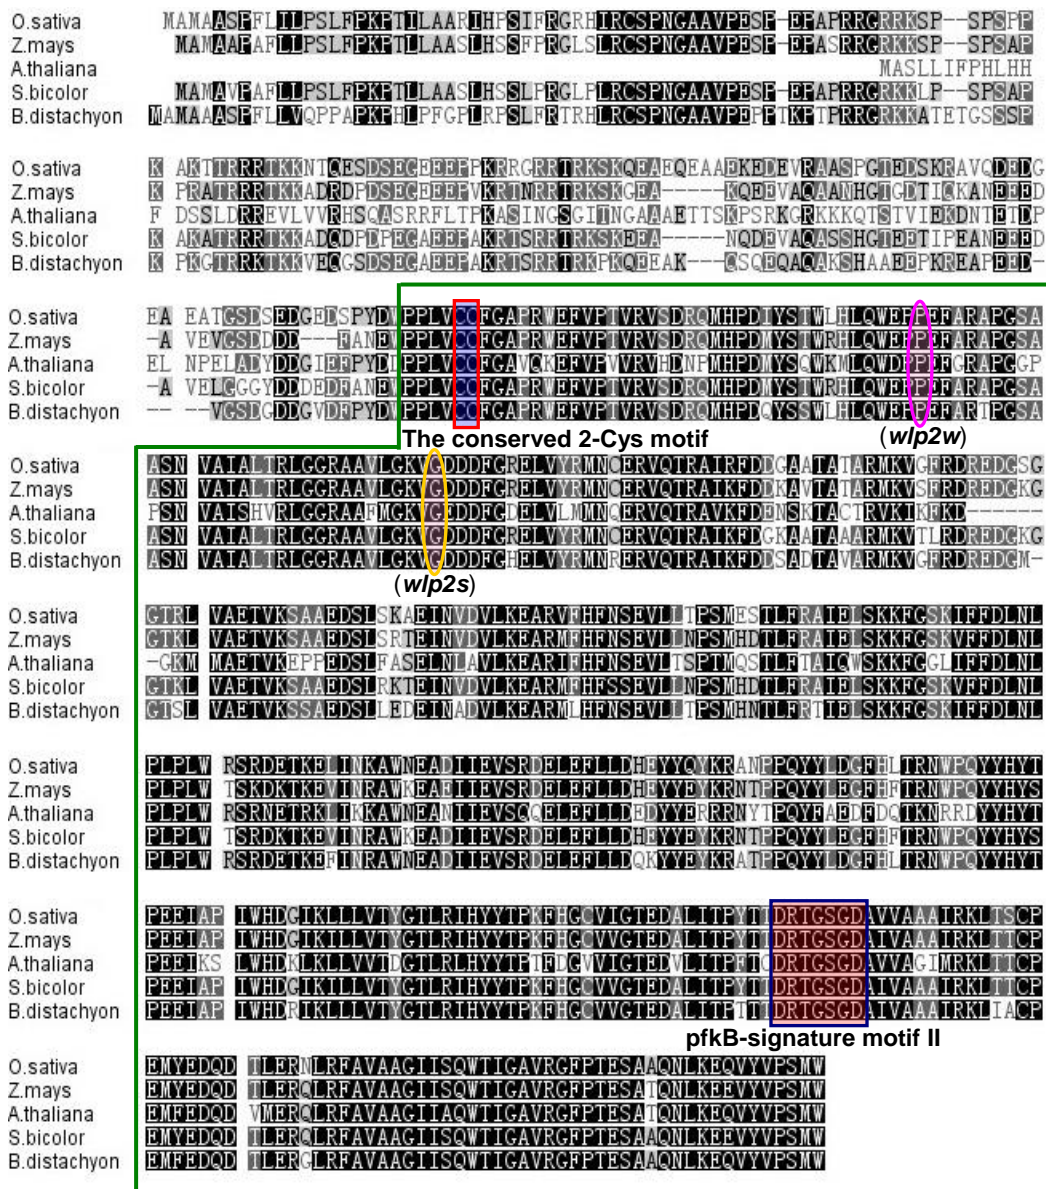

**Fig. S7.** Alignment of amino acid sequences of WLP2 homologous proteins from higher plants. Black shading indicates identical residues and gray shading similar residues. The comparison was aligned by CLUSTAL W. The green box represents the pfkB domain, the red box indicates the conserved double cysteine motif, and the blue box the pfkB-signature motif II. The oval boxes indicate the mutation sites of *wlp2s* and *wlp2w*. RefSeq numbers: O.sativa, XP\_015616764.1; Z.mays, NP\_001147575; A.thaliana, NP\_190977.1; S.bicolor, XP\_002456644.1; B.distachyon, XP\_003564619.1.



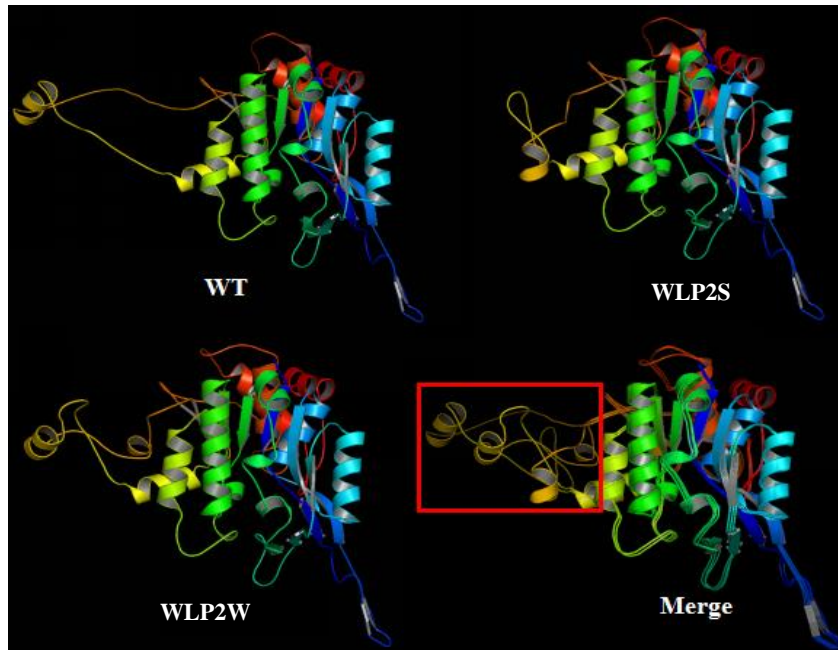

**Fig. S8.** Predicted 3D protein structures of WLP2 protein in the wild-type and the two *wlp2* mutants. Protein 3D structures were predicted by SWISS-MODEL (<http://swissmodel.expasy.org/>). The red box represents the region with 3D structure differences between wild type and the mutants

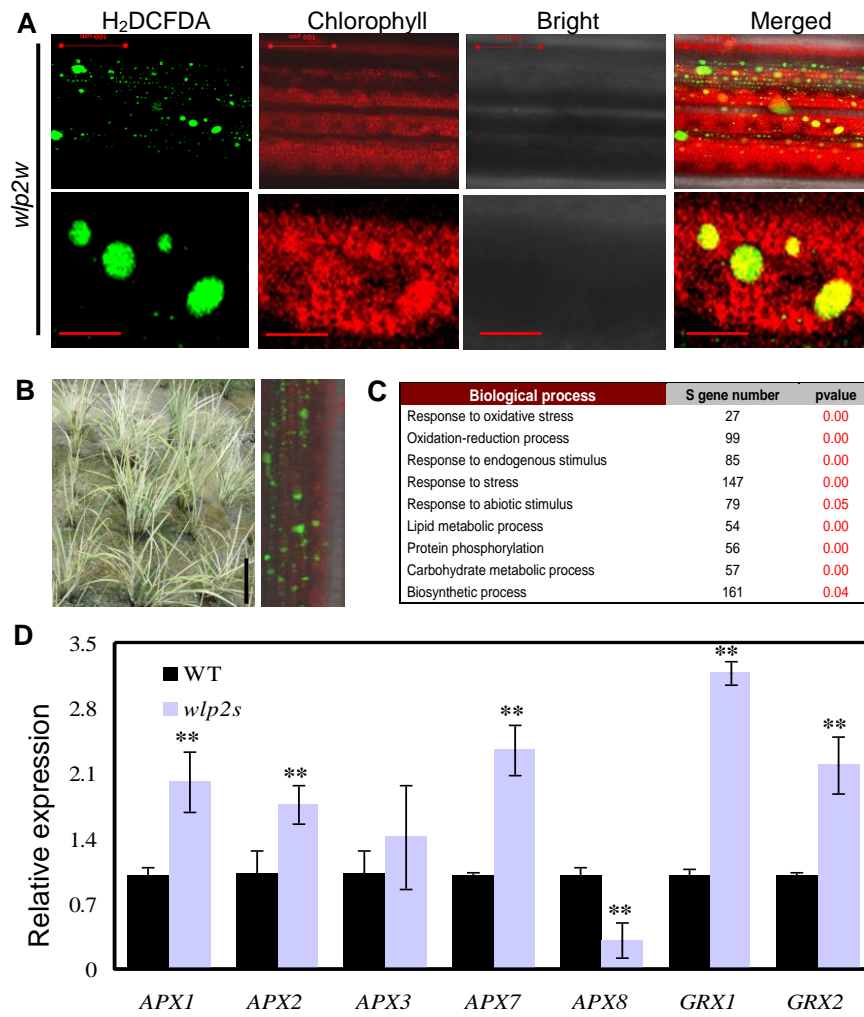

**Fig. S9.** ROS production induced by heat stress and RNA-seq analysis in *wlp2* mutants. (A) Microscopic analysis of leaves of two-week-old seedlings of *wlp2w* incubated with H<sub>2</sub>DCFDA. Oxidized H<sub>2</sub>DCFDA is represented in green staining and chlorophyll in red. (B) The excess produced ROS indicated redox imbalance in *wlp2s* when the mutant was suffered from heat stress under natural field conditions. (C) List of GO terms indicating the large number of genes associated with responses to abiotic stress. (D) The expression levels of genes associated with ascorbate peroxidase and glutaredoxin synthesis.

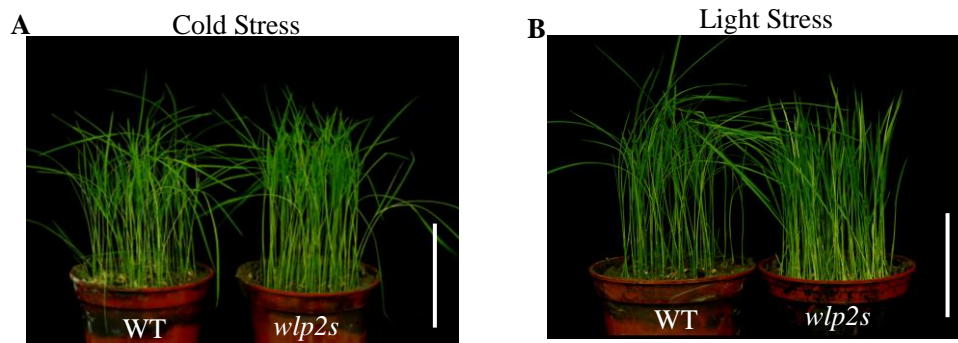

**Fig. S10.** The responses of two mutants and wild-type plants with other abiotic stresses. (A) The plants were grown under continuous 21 °C temperature conditions in a growth chamber (12/12 h light/dark; light intensity  $300 \mu\text{mol m}^{-2} \text{s}^{-1}$ ). (B) Both the mutants and wild-type plants were germinated and cultivated under high light conditions with light intensity  $1000 \mu\text{mol m}^{-2} \text{s}^{-1}$  (12/12 h light/dark, 26 °C temperature). Bars = 2 cm in A and B.

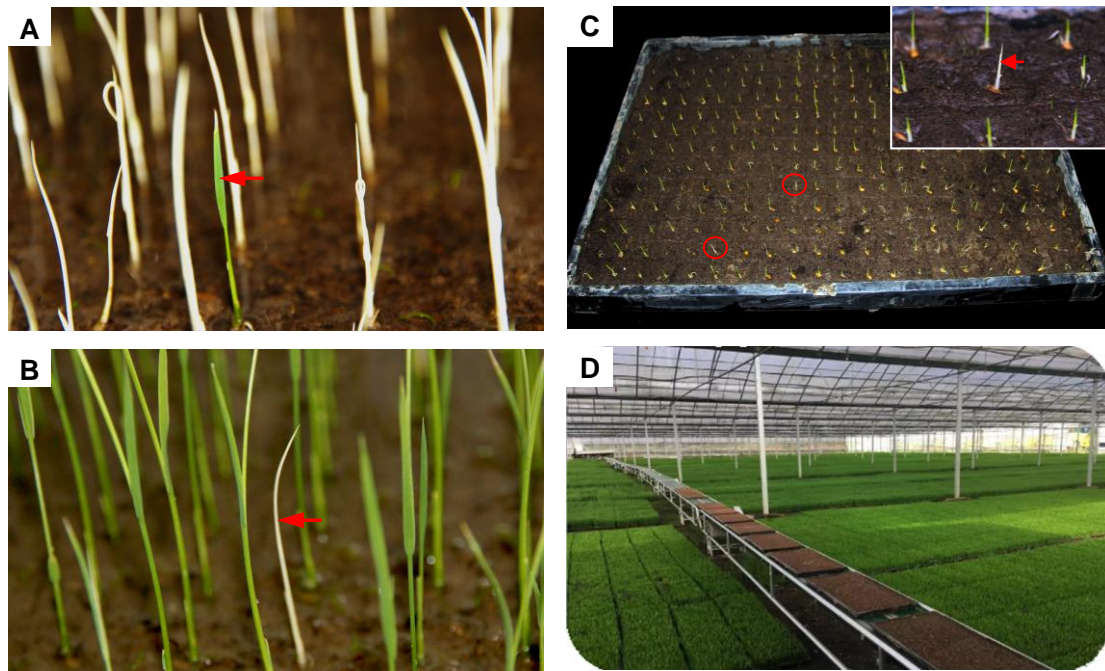

**Fig. S11.** Potential use of *wlp2w* as an early selective marker for enhancing seed purity and automated production of hybrid rice.

(A) The *wlp2w* acts as an early marker for eliminating the false seedlings to enhance sterility line purity. (B) Hybrids seeds derived from the cross MS Yu01s<sup>*wlp2w*</sup> and the restorer line Huazhan were germinated and grown in an incubator at 32 °C continuous temperature. The green seedlings are true F<sub>1</sub> hybrids and the albino dead seedlings are off-type seeds (false hybrids) that derived from self-pollination of MS Yu01s<sup>*wlp2w*</sup> (C) The *wlp2w* marker identifies self-pollination of the restorer lines during high through put production of hybrid seeds in trays at 32 °C constant temperature. (D) View of high through put industrial facility for the potential use of the *wlp2w* gene in the production of hybrid seeds.

**Supplementary Table S1.** Primer sequences used in this study.

| <b>Marker</b>               | <b>Forward sequence (5'-3')</b> | <b>Reverse sequence (5'-3')</b> |
|-----------------------------|---------------------------------|---------------------------------|
| <b>For fine mapping</b>     |                                 |                                 |
| YS1                         | GCTGGTTGATTCAGCTAGTC            | GCCTCGTTGTCGTTCCACAC            |
| YS2                         | CACATGCTCTGGACACCAAC            | GGAGCAAATAAGCCAACCAA            |
| YS3                         | TAGATCTGGATGCCTCATGC            | TTTACAAGCGTCCTCCTCCT            |
| YS4                         | AGCATTAGGAAGGCACCAAA            | CTCTGGCCAACATTGGTCTT            |
| YS5                         | GGCCACGTAATCTGATTTG             | CGACGATCGGACTTATCAGC            |
| YS6                         | GGGATTATTTGAAATCTTTGC           | ATATAGCATTGCCAGTTTGC            |
| YS7                         | GCCTGTAGTACCTGGCCTTG            | CAGTCGCTGCTCCACGTAT             |
| YS8                         | CCAAATTCTTTGTGCCACT             | GGTGCTGAAAATTGTGTTGC            |
| YS9                         | TTGCCAGTTGAGCAACATCT            | GGAAAGACTGCAATTTATTCTGAA        |
| YS10                        | GCAGCCATGGTGTGTCTCT             | GAGGAATGTCCTCTTTTCTTGA          |
| YS11                        | AATACTGTATCCTTGTGTAAGATTGC      | CCCCTTAGCTAGAAGCCAGA            |
| YS12                        | TGATTGATTGCTTGGCACTG            | AGATAGCTGCCTGCATCG              |
| YS13                        | TCCATCATCCATTCTGAGTTT           | TTCTTCTCCGTTCTGCTTC             |
| Indel 10                    | TTGATAACAAGTTTGTTTTATGTTTTG     | TTTGATCCCCAGATGAATGA            |
| Indel 14                    | TGTTTTGGAAACAAGTAGTGATGT        | CAGTGGATGTATGAACAAGTGGA         |
| Indel 20                    | GCAGTTCCATGCTAGTATTTTCA         | GCTGGAACACTCTTCCCAACT           |
| <b>For quantitative PCR</b> |                                 |                                 |
| <i>PORA</i>                 | TGTA CTGGAGCTGGAACAACAA         | GAGCACAGCAAATCCTAGACG           |
| <i>rbcL</i>                 | CTTGGCAGCATTCCGAGTAA            | ACAACGGGCTCGATGTGATA            |
| <i>rbcS</i>                 | TCCGCTGAGTTTTGGCTATTT           | GGACTTGAGCCCTGGAAGG             |
| <i>psaA</i>                 | GCGAGCAAATAAAACACCTTTC          | GTACCAGCTTAACGTGGGGAG           |
| <i>psbA</i>                 | CCCTCATTAGCAGATTCGTTTT          | ATGATTGTATTCCAGGCAGAGC          |
| <i>WLP2</i>                 | ACTCCCTCAATGGAAAGCACAC          | CCTTGACCTCCACAAAGGCAAT          |
| <i>rpoA</i>                 | GTGGAAGTGTGTTGAATCAA            | TCTCTCTTGATCCGTAACTC            |
| <i>rpoB</i>                 | TTTGGTTTCGATGTGCA               | TATGGTCTAATCCGAGCGGT            |
| <i>rpoTp</i>                | AAGCAGACAGTGATGACATC            | ATCACATGCATGCACCCAAA            |
| <i>rps12</i>                | AGCCGTTTGCTACCAATGG             | TGATCGGTACCAATGAATAGG           |
| <i>OsPPR1</i>               | CTAAGACCGAATGACAAATGC           | GCACTGCCAACAAGAATACC            |
| <i>Oscab1R</i>              | AGATGGGTTTAGTGCGACGAG           | TTTGGGATCGAGGGAGTATTT           |
| <i>Oscab2R</i>              | TGTTCTCCATGTTCCGGCTTCT          | GCTACGGTCCCCACTTCACT            |
| <i>CAO1</i>                 | GATCCATACCCGATCGACAT            | CGAGAGACATCCGGTAGAGC            |
| <i>YGL1</i>                 | AACCTTACCGTCCTATTCCTT           | CCATACATCTAACAGAGCACCC          |
| <i>VI(NUS1)</i>             | TGGAGGTCGGGACAGAGGA             | CGAGGAGCACCACCATCAC             |
| <i>V2</i>                   | CGACAAGCAGAGCGAAGCG             | AGGTTGCTGCTCCTTGAATGT           |
| <i>APX1</i>                 | TCCACCCAGGAAGGGAGG              | TTGGTAGCATCAGGAAGACGG           |
| <i>APX2</i>                 | TCCCCTACCCTGCTGCATC             | ACCAGCCAACCACTCGCA              |

|               |                         |                        |
|---------------|-------------------------|------------------------|
| <i>APX3</i>   | AGCACTCTCAGGCGGCC       | AGGCACCATCAAATCCTGATCT |
| <i>APX7</i>   | TTCACGTTGGACGGTTAATGC   | TTTCTGTAAAAGTGGTTGGCCA |
| <i>APX8</i>   | ATCATCGCCAGCGGATGA      | GCAGCGACGAAGGGCTC      |
| <i>OsFLN2</i> | AGGAGCCATTTACATTATAAGCC | AACTTACGTTTCGGTTGAGCA  |
| <i>OsTRXz</i> | GCCTCCCCTCCTGCGATG      | CATTCCGTCGAACGCCTTG    |

**For vector construction**

|                                    |                                                 |                                                     |
|------------------------------------|-------------------------------------------------|-----------------------------------------------------|
| 1305ubi:WLP2-GFP                   | CaaggtaccTCCCACCGAAGGAGAGAGCC                   | CTTactagtACCAGTCCGCCAGTCACCAC                       |
| 1381Z-GUS                          | CCGGAATTC CTAGCCCCACAGTGAACATG                  | CCCAAGCTT GTTCGGGGAGCAGCGAATAT                      |
| p35S-WLP2-GFP                      | GCCCAGATCAACTAGTATGGCCATGGCGGCCTCCCC            | TTTACTTTACTCTAGACCACATAGAAGGCACATA<br>TACTTGC       |
| p35S-WLP2 <sup>1-250AA</sup> -GFP  | CGGAGCTAGCTCTAGACGTCCCACGGTGC GG GTGT<br>CGGAC  | TGCTCACCATGGATCCCCACATAGAAGGACATATA<br>CTTG         |
| p35S-WLP2 <sup>1-150AA</sup> -GFP  | CGGAGCTAGCTCTAGAATGGCCATGGCGGCCTCCCCA<br>TT     | TGCTCACCATGGATCCCGGCGAATCTCCCCGTCT<br>TC            |
| p35S-WLP2 <sup>1-70AA</sup> -GFP   | CGGAGCTAGCTCTAGAATGGCCATGGCGGCCTCCCCA<br>TT     | TGCTCACCATGGATCCCGTGGTCTTCGCCTTCG                   |
| p35S-WLP2 <sup>1-50AA</sup> -GFP   | CGGAGCTAGCTCTAGAAAGAAGAATACGCAGGAGTC<br>T       | TGCTCACCATGGATCCGGGTT CAGGGGATTCCGGT<br>AC          |
| p35S-WLP2 <sup>1-30AA</sup> -GFP   | CGGAGCTAGCTCTAGAATGGCCATGGCGGCCTCCCCA<br>TT     | TGCTCACCATGGATCCGAAGATGCTGGGGTGGAT<br>GC            |
| p35S-WLP2 <sup>50-531AA</sup> -GFP | CGGAGCTAGCTCTAGAGTACCGGAATCCCCTGAACC<br>C       | TTTACTTTACTCTAGACCACATAGAAGGCACATA<br>TACTTGC       |
| pGADT7- TRXz                       | GGAGGCCAGTGAATTCATGGCCATGGCCGCGGCCGC<br>CTC     | CGAGCTCGATGGATCCACAATTCATTATCAATGAT<br>ATTCTGA      |
| pGADT7- OsFLN2                     | GGAGGCCAGTGAATTC<br>ATGCACCGAATGGCTTCTCTTCTCTC  | CGAGCTCGATGGATCC<br>ACTCCACATATAAAAAGCTCACTCTCT     |
| pGADT7-WLP2                        | GGAGGCCAGTGAATTCATGGCCATGGCGGCCTCCCC<br>ATTCT   | CGAGCTCGATGGATCC<br>ACCACATAGAAGGCACATATACTTGC      |
| pGBKT7-WLP2                        | CATGGAGGCCGAATTCATGCACCGAATGGCTTCTCTT<br>CTTCTC | TAGTTATGCGCCGCTGCAGACTCCACATATAAAA<br>GCTCACTCTCT   |
| pGBKT7- TRXz                       | CATGGAGGCCGAATTCATGGCCATGGCCGCGGCCGC<br>CTC     | TAGTTATGCGCCGCTGCAGACAATTCATTATCAA<br>TGATAITTTCTGA |
| pGBKT7-pfkB                        | CATGGAGGCCGAATTCGACATATACTCCACGTGGCTG<br>CATCT  | TAGTTATGCGCCGCTGCAGCTCAGTAGGGAATC<br>CTCGCACAGCA    |
| pSPYNE-OsFLN2                      | CGCCACTAGTGGATCC<br>ATGCACCGAATGGCTTCTCTTCTCTC  | TACCCTCGAGGTCGAC<br>ACTCCACATATAAAAAGCTCACTCTCT     |
| pSPYNE-WLP2                        | CGCCACTAGTGGATCCATGGCCATGGCGGCCTCCCCA<br>TTCT   | TACCCTCGAGGTCGACCCACATAGAAGGCACATA<br>TACTTGC       |
| pSPYCE- TRXz                       | CGCCACTAGTGGATCCATGGCCATGGCCGCGGCCGC            | TACCCTCGAGGTCGACCAATTCATTATCAATGATA                 |



|                 |                                       |                                                  |
|-----------------|---------------------------------------|--------------------------------------------------|
|                 | CTC                                   | TTTC                                             |
| PGEX-4T-TRXz    | GGTTCCGCGTGGATCCATGGCCATGGCCGCGGC     | GTCGACCCGGGAATTCTCACAATTCATTATCAATG<br>ATA       |
| pET-28a-OsFLN2  | AATGGGTCGCGGATCCATGCACCGAATGGCTTC     | GGTGGTGGTGTCTCGAGTCACTCCACATATAAAAG<br>CT        |
| pfast-bacI-WLP2 | CCACCATCGGGCGCGGATCCGCCACCATGCTGCTGGT | TAGTACTTCTCGACAAGCTTTCACCACATAGAAG<br>GCACATATAC |

---

**Supplementary Table S2.** Main agronomic traits of wild-type, *wlp2s* and *wlp2w* plants grown at the Hangzhou paddy field in 2014 and 2015.

| Year | Material     | Plant height (cm) | No. of tillers | Length of panicle (cm) | Seed setting rate (%) | 1000-grain weight (g) |
|------|--------------|-------------------|----------------|------------------------|-----------------------|-----------------------|
| 2015 | WT           | 97.88±2.90        | 11.33±2.08     | 22.73±1.20             | 0.57±0.01             | 24.15±0.19            |
|      | <i>wlp2s</i> | 78.67±2.52*       | 12.67±1.53     | 21.57±0.97             | 0.19±0.05**           | 17.95±0.84**          |
|      | <i>wlp2w</i> | 99.22±3.47        | 11.23±2.11     | 23.79±1.36             | 0.44±0.03*            | 21.06±0.23**          |
| 2014 | WT           | 103.4±2.01        | 8.6±1.95       | 22.98±0.99             | 0.75±0.06             | 27.29±0.74            |
|      | <i>wlp2s</i> | 90.78±1.49**      | 8.6±1.34       | 23.48±0.84             | 0.72±0.04             | 23.15±0.34**          |
|      | <i>wlp2w</i> | 106.24±3.01       | 9.00±1.88      | 23.18±0.98             | 0.76±0.08             | 26.38 ±0.65           |

The mean temperature at the heading stage in the summer of 2014 and 2015 were 28.5 °C and 32.8 °C, respectively. Data are shown as means ± SD from five replicates. The asterisks indicate statistical significance between the wild-type and the mutant, as determined by the Student's *t*-test (\*  $P < 0.05$ ; \*\*  $P < 0.01$ ).

**Supplementary Table S3.** Genetic analysis for the *wlp2s* mutant gene.

The segregation behavior in each of the two derived F<sub>2</sub> populations was consistent with the Mendelian monogenic ratio of three wild type to one albino

| <b>Cross</b>          | <b>Number of wild type plants</b> | <b>Number of <i>wlp2s</i> type plants</b> | <b><math>\chi^2</math> (3:1)</b> | <b>P</b> |
|-----------------------|-----------------------------------|-------------------------------------------|----------------------------------|----------|
| <i>wlp2s</i> /NJ11    | 5037                              | 1607                                      | 2.340759                         | 0.126    |
| <i>wlp2s</i> /Peiai64 | 322                               | 117                                       | 0.638573                         | 0.424    |
